# Supplementary material
Source: PubMed Central journal article supplement (PMC4820780)

## Supplemental Data

**Article Title:** Cocaine and metabolites concentrations in dried blood spots and venous blood after controlled intravenous cocaine administration

**Journal Name:** Bioanalysis

*Kayla N. Ellefsen<sup>1,2</sup>, Jose Luiz da Costa<sup>1,3</sup>, Marta Concheiro<sup>4</sup>, Sebastien Anizan<sup>1</sup>, Allan J. Barnes<sup>1</sup>, Sandrine Pirard<sup>1</sup>, David A. Gorelick<sup>5</sup> and Marilyn A. Huestis<sup>1</sup>*

<sup>1</sup>Chemistry and Drug Metabolism Section, IRP, National Institute on Drug Abuse, National Institutes of Health, Baltimore, MD, USA

<sup>2</sup>Program in Toxicology, University of Maryland Baltimore, Baltimore, MD

<sup>3</sup>Forensic Toxicology and Chemistry Laboratory, Criminalistics Institute of Sao Paulo, Sao Paulo, SP, Brazil

<sup>4</sup>Currently at Department of Sciences, John Jay College of Criminal Justice, City University of New York, New York, NY

<sup>5</sup>Department of Psychiatry, University of Maryland School of Medicine, Baltimore, MD

### Corresponding Author

Professor Dr. Dr. (h.c.) Marilyn A. Huestis

Chief, Chemistry and Drug Metabolism, IRP

National Institute on Drug Abuse, National Institutes of Health

251 Bayview Boulevard, Suite 200 Room 05A-721

Baltimore, MD, 21224

Phone: 443-740-2524

Fax: 443-740-2524

Email: [mhuestis@intra.nida.nih.gov](mailto:mhuestis@intra.nida.nih.gov)

**Supplemental Data Table 1.** Gas chromatography, mass spectrometry (MS), Deans switch, flame ionization (FID) and mass selective (MSD) detectors and back inlet (cold trap) method parameters for the detection and quantification of cocaine and benzoylecgonine (BE) in human venous blood.

| Electron Ionization Parameters |                         |                   |                  |
|--------------------------------|-------------------------|-------------------|------------------|
| Deans switch                   |                         | Back Inlet        |                  |
| FID restrictor L.              | 212.7 cm                | Initial T         | 250°C            |
| FID restrictor i.d.            | 0.180 mm                | Initial time      | 2.5 min          |
| Aux 3 pressure                 | 12.9 psi                | Ramp #1           | 800°C/min        |
| Front inlet                    |                         | Final T; time     | 100°C; 5.3 min   |
| Flow mode                      | Constant pressure       | Ramp #2           | 800°C/min        |
| Pressure                       | 21.85 psi               | Final T; time     | 250°C; 0 min     |
| Total flow                     | 55.3 mL/min             | Oven              |                  |
| Inlet T                        | 250°C                   | Initial oven T    | 150°C            |
| Injection mode                 | Splitless               | Initial oven hold | 0.5 min          |
| Injection volume               | 2 µL                    | Ramp #1           | 30°C/min         |
| Liner type                     | Single-taper glass wool | Final T; time     | 290°C; 0.5 min   |
| FID and MSD                    |                         | Ramp #2           | 75°C/min         |
| FID T                          | 250°C                   | Final T; time     | 180°C; 1.5 min   |
| Hydrogen flow (OFF)            | 40 mL/min               | Ramp #3           | 20°C/min         |
| Air flow (OFF)                 | 450 mL/min              | Final T; time     | 280°C/min; 0 min |
| MSD reagent gas                | Vacuum                  | Post Ramp         | 40°C/min         |
| MSD transfer line T            | 280°C                   | Post T            | 320°C; 4 min     |
| MS source T                    | 230°C                   | Post time         | 4 min            |
| MS quad T                      | 150°C                   | Column 1 pressure | 21.85 psi        |
| EM offset (total)              | 506 (2612)              | Column 2 pressure | 12.9 psi         |

**Supplemental Data Table 2.** Demographic and self-reported cocaine histories for 13 cocaine users

| Ppt | Race        | Sex | Age (years) | Weight (lbs) | Days used in past 14 (SM or IV) | Mean use (SM or IV) | Age first use (SM or IV) (years) |
|-----|-------------|-----|-------------|--------------|---------------------------------|---------------------|----------------------------------|
| A   | AA          | M   | 44.0        | 176          | 4 SM                            | 2-3/week            | 38                               |
| B   | AA          | M   | 38.1        | 202          | 11 SM                           | 5/week              | 32                               |
| C   | More than 1 | M   | 42.4        | 162          | 5 IV<br>0 SM                    | 3/week<br>3-4/month | 32<br>21                         |
| D   | W           | M   | 35.2        | 165          | 3 SM                            | 1/week              | 25                               |
| E   | AA          | M   | 45.3        | 206          | 0 IV<br>5 SM                    | N/A<br>4/week       | 34<br>18                         |
| F   | W           | M   | 44.0        | 197          | 5 SM                            | Daily               | 18                               |
| G   | W           | M   | 42.5        | 180          | 6 IV<br>7 SM                    | 3/week<br>2/week    | 28<br>31                         |
| H   | AA          | M   | 43.7        | 150          | 14 SM                           | Daily               | 21                               |
| I   | AA          | M   | 49.9        | 175          | 10 SM                           | 4-5/week            | 25                               |
| J   | AA          | M   | 46.5        | 176          | 1 SM                            | 3/week              | 15                               |
| K   | W           | M   | 39.2        | 175          | 0 IV<br>0 SM                    | N/A<br>Daily        | 35<br>11                         |
| L   | AA          | M   | 48.8        | 153          | 10 SM                           | 5-6/week            | 18                               |
| M   | AA          | F   | 36.6        | 140          | 0 SM                            | 2/week              | 20                               |

*Ppt* participant, *SM* smoked, *IV* intravenous, *AA* African-American, *W* White, *M* male

**Supplemental Data Table 3.** Potential exogenous interferences analyzed at 500 µg/L in dried blood spots (DBS) by liquid chromatography-high resolution mass spectrometry and in venous blood by two dimensional-gas chromatography mass spectrometry.

|         | Interferences                                                                                                                                                                                                                                                                                                                                                                                                                                                                                                                                                                                                                                   |
|---------|-------------------------------------------------------------------------------------------------------------------------------------------------------------------------------------------------------------------------------------------------------------------------------------------------------------------------------------------------------------------------------------------------------------------------------------------------------------------------------------------------------------------------------------------------------------------------------------------------------------------------------------------------|
| Group 1 | morphine, normorphine, morphine-3-glucuronide, morphine-6-glucuronide, codeine, norcodeine, 6-monoacetyl-morphine, 6-acetyl codeine, hydrocodone, hydromorphone, oxycodone, noroxycodone, oxymorphone, noroxymorphone                                                                                                                                                                                                                                                                                                                                                                                                                           |
| Group 2 | diazepam, lorazepam, alprazolam, imipramine, clomipramine, fluoxetine, norfluoxetine                                                                                                                                                                                                                                                                                                                                                                                                                                                                                                                                                            |
| Group 3 | $\Delta^9$ -tetrahydrocannabinol, 11-hydroxy- $\Delta^9$ -tetrahydrocannabinol, 11-nor-9-carboxy- $\Delta^9$ -tetrahydrocannabinol, cannabidiol, cannabinol                                                                                                                                                                                                                                                                                                                                                                                                                                                                                     |
| Group 4 | methamphetamine, amphetamine, <i>p</i> -hydroxymethamphetamine, <i>p</i> -hydroxyamphetamine, hydroxymethoxymethamphetamine, hydroxymethoxyamphetamine, methylenedioxyamphetamine, methylenedioxyamphetamine, methylenedioxyethylamphetamine, <i>p</i> -methoxyamphetamine, <i>p</i> -methoxymethamphetamine, ketamine, dextromethorphan, phentermine, ecgonine, norcocaine, cocaethylene, norcocaethylene                                                                                                                                                                                                                                      |
| Group 5 | (±)-ephedrine, (±)-pseudoephedrine, acetylsalicylic acid, ibuprofen, caffeine, acetaminophen                                                                                                                                                                                                                                                                                                                                                                                                                                                                                                                                                    |
| Group 6 | cathinone, methcathinone, 4-fluoromethcathinone, methylone, ethylcathinone, $\alpha$ -pyrrolidinopentiophenone, buphedrone ephedrine, ethylone, 4-methoxymethcathinone, buphedrone, normephedrone, diethylcathinone, 3',4'-methylenedioxy- $\alpha$ -pyrrolidinopropiophenone, 4-methylephedrine, butylone, mephedrone, 4-methylethcathinone, 4-methyl-N-ethyl-norephedrine, 3',4'-methylenedioxy- $\alpha$ -pyrrolidinobutiophenone, Pentedrone, pentylone, 3',4'-dimethylmethcathinone, $\alpha$ -pyrrolidinopentiophenone, 4-methyl- $\alpha$ -pyrrolidinobutiophenone, 3',4'-methylenedioxyprovalerone, pyrovalerone, benzedrone, naphyrone |

**Supplemental Data Figure 1a)** Liquid chromatography-high resolution mass spectrometry chromatogram of a dried blood spot (DBS) sample fortified at the limits of quantification (1  $\mu\text{g/L}$ ) for cocaine, benzoylecgonine (BE) and norcocaine and **b)** two dimensional-gas chromatography mass spectrometry chromatogram of a venous blood sample fortified at the LOQ (1  $\mu\text{g/L}$ ) for cocaine and BE.

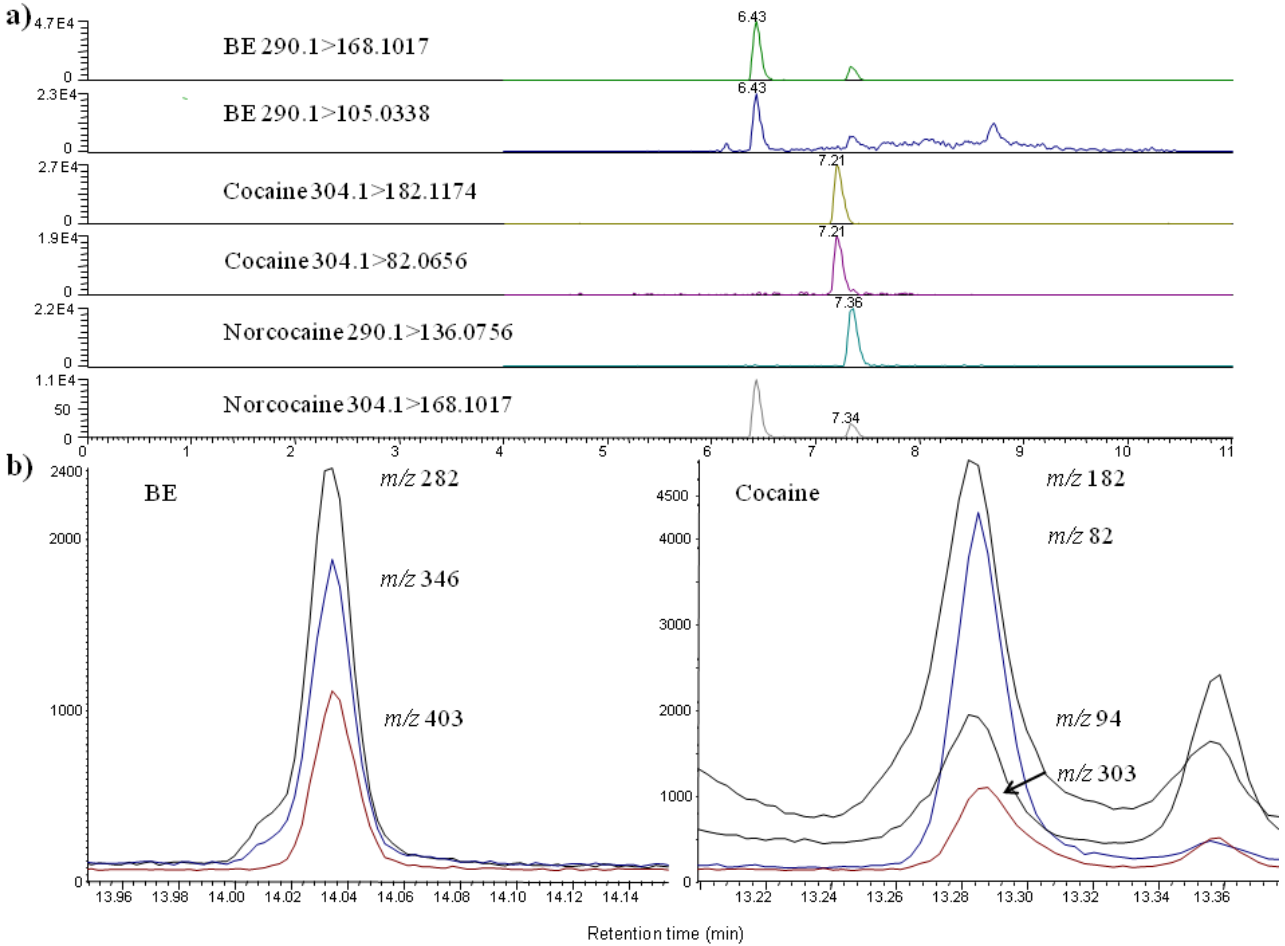

Supplement: bio-07-2041-s1.pdf [file bio-07-2041-s1.pdf]
